# Supplementary material for: Immune dysregulation caused by homozygous mutations in CBLB
Source: PubMed Central journal article supplement (PMC9566886; doi:10.1172/jci154487), 2022-10-17
Supplement: jci-132-154487-s100.pdf [file jci-132-154487-s100.pdf]

## SUPPLEMENT

### METHODS

*Sequencing.* DNA was extracted from EDTA treated blood or from dried blood spots on filter cards (CentoCard®) using standard, spin column-based methods. Exome sequencing was performed as previously described (20). In short, the Nextera Rapid Capture Exome Kit (Illumina) or the SureSelect Human All Exon kit (Agilent) were used for enrichment, and a Nextseq500 or HiSeq4000 (Illumina) instrument was utilized for sequencing with the average coverage targeted to at least 100x or at least 98% of the target DNA covered 20x. Data analysis, including base calling, de-multiplexing, alignment to the hg19 human reference genome (Genome Reference Consortium GRCh37), and variant calling, was performed using the HiSeq Analysis Software v2.0 pipelines (Illumina). Variants were annotated using SnpEff [21] and in-house bioinformatics tools [20].

Variants of suboptimal quality were confirmed via Sanger sequencing according to our established criteria (22). Forward and reverse primers were used for Sanger sequencing, on a 3730xl sequencer (Thermo Fisher Scientific). Variant nomenclature followed standard Human Genome Variation Society (HGVS) recommendations (23). Our data repository (CentoMD®) 17 contains ES/GS data from 60,234 individuals, of whom, 32,650 individuals have clinical descriptions that include at least one HPO term. After the initial identification of *CBLB* as a candidate gene, the data repository was queried for other rare variants in the gene and the clinical features and affection status of the individuals.

*Cell preparation.* Human PBMCs were isolated as previously described (24). EBV-transformed B cell lines from patients and controls were established as described (25).

*Human T cell proliferation.* CD4<sup>+</sup>CD25<sup>-</sup> Teff cells were isolated from PBMCs using magnetic beads (Miltenyi). Teff cells were loaded with Cell Trace CFSE (Thermo Fisher) to monitor cell divisions and stimulated with anti-CD3 conjugated beads (Miltenyi) alone or with anti-CD28 (CD28.2, Biolegend). CD4<sup>+</sup>CD25<sup>+</sup> Treg cells were similarly isolated using magnetic beads

(Miltenyi), and co-incubated with Teff cells for suppression assays. On day 4, cells were stained with anti-CD4 and eFluor 780 viability dye (Thermo Fisher). Divided CD4<sup>+</sup> Teff cells were determined by flow cytometry.

*Basophil activation.* The basophil activation test was performed using the Flow CAST Basophil Activation Test kit (Bühlmann Laboratories). 50 µl of whole blood from a healthy, non-allergic donor was incubated with 100 µl of patient or healthy control serum and 50 µl of buffer. Samples were incubated for 15 min at 37°C with staining antibodies for human PE anti-CCR3 (5E8, Biolegend) and FITC anti-CD63 (H5C6, BD Biosciences). Anti-IgE mAb (Southern Biotech) was used as a positive control for basophil activation.

Stimulation was stopped with the addition of lyse/fix for the lysis of red blood cells. Samples were then washed and assessed by flow cytometry. Basophils were identified as SSC<sup>low</sup>CCR3<sup>+</sup> and activation was assessed by CD63 expression.

*Generation of *Cblb*<sup>H257L</sup> mice.* sgRNA design was facilitated through the CRISPOR design tool to minimize off-target effects. A guide was selected with predicted double-stranded cutting 8 nucleotides from the intended c.854A>T:p.H285L mutation (Synthego). A 121 bp repair template with the c.854A>T mutation as well as 3 synonymous change in the protospacer sequence were generated (PAGE Ultamer from Integrated DNA Technologies). Zygotes from C57BL/6 mice were microinjected with the sgRNA, repair template, and Cas9 protein (Integrated DNA Technologies). The resulting mice were screened by PCR and Sanger sequencing to select for mice bearing the p.H257L mutation. Mice were bred to generate mice homozygous for the p.H257L mutation. Homozygous *Cblb*<sup>H257L</sup> and WT C57BL/6 mice were bred and maintained under specific pathogen free conditions. Both female and male mice were used in all experiments.

*Immunoblotting.* Cells were lysed in 1% Triton buffer (150 mM NaCl, 25 mM Tris-Cl, pH 7.5, 5 mM EDTA) containing complete protease inhibitors (Roche). Cell lysates were separated by SDS-PAGE, transferred to nitrocellulose. The following antibodies were used for

immunoblotting - N-terminal directed CBL-B antibody (G-1, Santa Cruz Biotechnology), pY (4G10, Millipore), and C-terminal directed CBL-B antibody (D3C12), STAT3 (79D7), GAPDH (14C10), pY<sup>220</sup> LAT (3584), pY<sup>526</sup> SYK (C87C1), pY<sup>352</sup>SYK (2701), pPLC $\gamma$ 1 (D6M9), and pPLC $\gamma$ 2 (3871) from Cell Signaling Technology. Protein band intensities were quantified by densitometry using the ImageJ software (Wayne Rasband, NIH).

*Flow cytometry.* Single cell suspensions of mouse spleens and lymph nodes were lysed using ACK lysis buffer (Life Technologies). Cell suspensions were incubated with TruStain FcX (anti-CD19/CD32, Biolegend) and eF506 viability (ThermoFisher) to exclude dead cells. For staining of surface molecules, cells were incubated on ice with fluorochrome conjugated mAbs against - CD3 (145-2C11), CD4 (GK1.5), CD8 (53-6.7), CD25 (PC61), CD69 (H1.2F3), CD62L (Mel-14), CD23 (B3B4), IgM (RMM-1), IgD (11-26c.2a), CD93 (AA4.1), B220 (RA3-6B2), CD21 (7E9), PD1 (RMP1-30), CXCR5 (L138D7), GL-7, CD117 (2B8), and Fc $\epsilon$ RI (MAR-1) from Biolegend, and FAS (15A7) from Thermo Fisher. For staining of transcription factors, cells were fixed and permeabilized using the eBioscience Transcription Factor Staining Buffer Set (Thermo Fisher) according to the manufacturer's directions. An antibody against Foxp3 (FJK-16s, Thermo Fisher) was used to identify Treg cells.

Human plasma cytokines and chemokines were measured using the BD CBA human inflammatory cytokine and chemokine kits (BD Biosciences) according to the manufacturer's directions.

Mouse splenocytes were loaded with Fluo-4 (Thermo Fisher) according to the manufacturer's directions. Cells were stained with antibodies against CD4 and B220. T cells were stimulated by the addition of 10  $\mu$ g/ml anti-CD3 (2C11, Biolegend) and cross-linking with anti-Armenian Hamster IgG (Jackson ImmunoResearch). 1  $\mu$ M Ionomycin (Sigma-Aldrich) was added after 4 minutes.

Mouse splenocytes were stimulated by anti-CD3 cross-linking as described above. Cells were fixed and permeabilized using BD Cytofix Fixation buffer and BD Phosflow Perm buffer III

(BD Biosciences) according to the manufacturer's directions. Cells were stained with antibodies against CD4, B220, pS<sup>473</sup> Akt (560343, BD Biosciences), and pT<sup>202</sup>/Y<sup>204</sup> Erk1/2 (13148, Cell Signaling).

All flow cytometry data was collected using an LSR Fortessa cell analyzer (BD Biosciences) and analyzed with FlowJo software (Tree Star).

*Autoantibody detection.* Human plasma IgG autoantibodies were measured using an autoantigen proteomic array (128 antigen panel) through the UT Southwestern Medical Center Microarray Core as previously described [14]. Autoantigens with a signal-to-noise ratio of >3 were analyzed. Heat maps are shown for antigens with a calculated p value of <0.05 by Student's t test. Autoantigen values were normalized to the geometric mean for all samples and visualized as a heat map using GraphPad PRISM.

Mouse sera was diluted in PBS and applied to slides of HEp-2 cells (Fisher) for 30 min. Slides were washed with PBS+1% Tween and bound IgG was detected with anti-mouse IgG conjugated to AlexaFluor 488 (Biolegend). Samples were scored by 3 blinded individuals.

*Mouse lymphocyte proliferation.* Total B cells and CD4<sup>+</sup>CD25<sup>-</sup> Teff cells were purified from mouse spleens using magnetic beads (Miltenyi Biotec). Cells were labeled with Cell Trace Violet (Thermo Fisher). B cells were plated at 200,000 cells per well in a 96 well plate with 100 ng/ml-10 µg/ml anti-IgM (Jackson ImmunoResearch). CD4<sup>+</sup>CD25<sup>-</sup> Teff cells were plated at 200,000 cells per well in a 96 well plate coated with anti-CD3 (2C11, Biolegend). Teff cell proliferation was also examined in response to 1 µg/ml anti-CD3 and 10 µg/ml anti-CD28 (37.51, Biolegend).

On day 4, cells were stained with anti-CD4 or anti-B220 and eFluor 780 viability dye (Thermo Fisher). Divided CD4<sup>+</sup> T and B cells were determined by flow cytometry. Supernatants from CD4<sup>+</sup>CD25<sup>-</sup> T cell cultures were collected, and IL-2 content was measured by ELISA (Thermo Fisher).

*Mouse Treg cell suppression assays.* CD4<sup>+</sup> T cells were enriched for by negative selection using the CD4<sup>+</sup> T cell isolation kit (Miltenyi Biotec). CD4<sup>+</sup>CD25<sup>-</sup>CD39<sup>-</sup> Teff cells and

CD4<sup>+</sup>CD25<sup>+</sup>CD39<sup>+</sup> Treg cells were sorted using an MA900 FACS (SONY). Teff cells were labeled with Cell Trace Violet (Life Technologies) to monitor cell divisions. Teff cells were stimulated with 1 µg/ml anti-CD3 mAb (2C11, Affymetrix) in the presence of T cell depleted splenocytes treated with 25 µg/ml mitomycin C (Santa Cruz Biotechnology) in the presence or absence of Treg cells. On day 4, Teff cell divisions were determined by flow cytometry.

*Immunizations.* Mice were immunized *i.p.* with 10 µg TNP-Ficoll (F-1300, Biosearch) or 10 µg TNP-LPS (T-5065, Biosearch). Sera was collected on days 0 and 14. Mice were immunized either *i.p.* or in the bilateral hocks with 10 µg of TNP-KLH (T-5060, Biosearch) in alhydrogel adjuvant (vac-alu-250, Invivogen), and boosted at day 14 with 2.5 µg of TNP-KLH in alum. Sera were collected at days 0 and 21. To examine GC B cell and Tfh cell generation, the draining LNs (inguinal and popliteal) were harvested on day 10 from hock immunized mice.

*ELISAs.* For detection of total serum immunoglobulins, 96-well plates were coated with anti-IgG, IgM, and IgA from Southern Biotech. After serum incubation, alkaline phosphatase-conjugated rat anti-mouse IgG, IgM, or IgA (Southern Biotech) were applied to plate for 2 h at room temperature. Bound secondary antibodies were detected by incubation with p-nitrophenyl phosphate (PNPP) substrate (Sigma-Aldrich). Serum concentrations of MCPT-1 were determined by ELISA per the manufacturer's directions (Invitrogen).

*LAMP-1 mobilization on BMMCs.* BMMCs were cultured from bone marrow collected from 8-10-week-old mice as detailed in reference [26]. BMMCs were incubated with 50 ng/ml of anti-DNP IgE (clone SPE-7, Sigma-Aldrich). After 24 h, BMMCs were stimulated with 0-25,000 ng/ml DNP-BSA (Sigma Aldrich) and stained for surface LAMP-1 (clone 1D4B, Biolegend).

*Passive oral anaphylaxis.* Mice were passively sensitized 10 µg anti-trinitrophenyl (TNP)-IgE *i.p.*, a gift from Dr. Fred Finkelman, and injected with an implantable temperature transponder (IPTT-300, Bio Medic Data Systems). The following day, mice were challenged by oral gavage of 2.5 mg TNP-BSA (Biosearch, T-5050). Core body temperatures were measured serially for 60

min after gavage using a DAS-6001 Smart Probe (Bio Medic Data Systems). Blood was collected for MCPT-1 measurement at 60 min after challenge.

## SUPPLEMENTAL REFERENCES

20. Trujillano, D., et al., Clinical exome sequencing: results from 2819 samples reflecting 1000 families. *Eur J Hum Genet.* 2017; 25(2):176-182.
21. Cingolani, P., et al., A program for annotating and predicting the effects of single nucleotide polymorphisms, SnpEff: SNPs in the genome of *Drosophila melanogaster* strain w1118; iso-2; iso-3. *Fly (Austin).* 2012; 6(2): 80-92.
22. Bauer, P., et al., Development of an evidence-based algorithm that optimizes sensitivity and specificity in ES-based diagnostics of a clinically heterogeneous patient population. *Genet Med.* 2019; 21(1): 53-61.
23. den Dunnen, J.T., et al., HGVS Recommendations for the Description of Sequence Variants: 2016 Update. *Hum Mutat.* 2016; 37(6): 564-9.
24. Janssen, E., et al., A DOCK8-WIP-WASp complex links T cell receptors to the actin cytoskeleton. *J Clin Invest.* 2016. 126(10); 3837-3851.
25. Jabara, H.H., S.R. Brodeur, and R.S. Geha, Glucocorticoids upregulate CD40 ligand expression and induce CD40L-dependent immunoglobulin isotype switching. *J Clin Invest.* 2001. 107(3); 371-8.
26. Galand, C., et al., IL-33 promotes food anaphylaxis in epicutaneously sensitized mice by targeting mast cells. *J Allergy Clin Immunol.* 2016. 138(5); 1356-1366.
27. Jolliff, C.R., et al., Reference intervals for serum IgG, IgA, IgM, C3, and C4 as determined by rate nephelometry. *Clin Chem.* 1982. 28(1); 126-8.
28. Martins, T.B., et al., New childhood and adult reference intervals for total IgE. *J Allergy Clin Immunol.* 2014. 133(2); 589-91.

## **SUPPLEMENTAL LEGEND**

**Supplemental Figure 1. Increased autoantibodies in P1 and P2.** A heatmap of reactivity of IgG antibodies against self-antigens in 16 HCs, P1, and P2. Only the 19 autoantigens for which binding was significantly higher in the patients ( $p < 0.05$ ) are shown. Binding was normalized to the geometric mean for each antigen.



**Supplemental Table 1. Patient laboratory values.**

|                                                                                                  | Patient 1                                                                                                                                        | Patient 2                                   | Patient 3                                                                                                     |
|--------------------------------------------------------------------------------------------------|--------------------------------------------------------------------------------------------------------------------------------------------------|---------------------------------------------|---------------------------------------------------------------------------------------------------------------|
| <b>CBLB mutation</b>                                                                             | c.854A>T (p.His285Leu)                                                                                                                           | c.1486C>T (p.Arg496X)                       | c.1392C>G (p.Cys464Trp)                                                                                       |
| Age at study (years)                                                                             | 16                                                                                                                                               | 11                                          | 4                                                                                                             |
| <b>Blood Counts</b>                                                                              |                                                                                                                                                  |                                             |                                                                                                               |
| Hemoglobin (g/L)                                                                                 | 9.6                                                                                                                                              | 9.3                                         | <b>6.8</b>                                                                                                    |
| Platelets (cells/ $\mu$ L)                                                                       | 280,000                                                                                                                                          | 190,000                                     | <b>37,000</b>                                                                                                 |
| WBCs (cells/ $\mu$ L)                                                                            | 8,800                                                                                                                                            | 3,700                                       | 6,300                                                                                                         |
| Neutrophils (cells/ $\mu$ L)                                                                     | 6,700                                                                                                                                            | 1,300                                       | 1,300                                                                                                         |
| Lymphocytes (cells/ $\mu$ L)                                                                     | 1,600                                                                                                                                            | 2,200                                       | 4,200                                                                                                         |
| <b>Lymphocyte subsets (cells/<math>\mu</math>L)*</b>                                             |                                                                                                                                                  |                                             |                                                                                                               |
| CD3 <sup>+</sup>                                                                                 | 1,420                                                                                                                                            | 2,060                                       | 1,880                                                                                                         |
| CD3 <sup>+</sup> CD4 <sup>+</sup> cells                                                          | 843                                                                                                                                              | 1,329                                       | 850                                                                                                           |
| CD3 <sup>+</sup> CD8 <sup>+</sup> cells                                                          | 597                                                                                                                                              | 736                                         | 700                                                                                                           |
| CD19 <sup>+</sup> cells                                                                          | 455                                                                                                                                              | 404                                         | 1,010                                                                                                         |
| CD3 <sup>+</sup> CD56 <sup>+</sup>                                                               | 363                                                                                                                                              | 23                                          | 13                                                                                                            |
| <b>Immunoglobulins (mg/dL) [normal range for age] (26, 27)</b>                                   |                                                                                                                                                  |                                             |                                                                                                               |
| IgG                                                                                              | <b>199</b> [639-1349]                                                                                                                            | 903 [639-1349]                              | 560 [424-1051]                                                                                                |
| IgA                                                                                              | <b>&lt;23</b> [70-312]                                                                                                                           | 126 [70-312]                                | 30 [14-123]                                                                                                   |
| IgM                                                                                              | <b>33.6</b> [56-352]                                                                                                                             | 66 [56-352]                                 | <b>38</b> [48-168]                                                                                            |
| IgE (IU/ml)                                                                                      | <2 [<537]                                                                                                                                        | 39.5 [<696]                                 | 38 [<307]                                                                                                     |
| <b>Vaccine titers</b>                                                                            |                                                                                                                                                  |                                             |                                                                                                               |
|                                                                                                  | <b><i>Tetanus IgG &lt;0.1 IU/ml<br/>Diphtheria IgG &lt;0.01 IU/ml<br/>Pneumococcal &lt;0.1 <math>\mu</math>g/ml (for all strains tested)</i></b> | Tetanus IgG 0.43 IU/ml<br>N/A<br>N/A<br>N/A | Tetanus 0.16 IU/ml<br>Diphtheria 0.3 IU/ml<br><b><i>Pneumococcal &lt;17 U/ml (for all strains tested)</i></b> |
| <b>Basophil activation [data for 5 HCs]</b><br>[HCs 1.18 $\pm$ 0.6% CD63 <sup>+</sup> basophils] |                                                                                                                                                  |                                             |                                                                                                               |
|                                                                                                  | <b>30.8</b>                                                                                                                                      | 0.38                                        | 3.33                                                                                                          |
| <b>Serum Cytokines (pg/ml) and chemokines [data for 3 HCs]</b>                                   |                                                                                                                                                  |                                             |                                                                                                               |
| IL-6 [6.3 $\pm$ 1.1]                                                                             | <b>7,254</b>                                                                                                                                     | <b>13</b>                                   | <b>11,321</b>                                                                                                 |
| TNF- $\alpha$ [8.0 $\pm$ 0.7]                                                                    | <b>21</b>                                                                                                                                        | <b>49</b>                                   | <b>1,093</b>                                                                                                  |
| IL-10 [6.4 $\pm$ 1.3]                                                                            | <b>68</b>                                                                                                                                        | <b>23</b>                                   | <b>24</b>                                                                                                     |
| CXCL9 [38.7 $\pm$ 25.9]                                                                          | <b>674</b>                                                                                                                                       | <b>81</b>                                   | <b>314</b>                                                                                                    |
| CXCL10 [1,313 $\pm$ 683]                                                                         | <b>22,204</b>                                                                                                                                    | 1,432                                       | <b>5,562</b>                                                                                                  |

\*Lymphocyte subsets determined on a different day than the CBC. Abnormal values are italicized and in bold.

Supplemental Table 2. Rare homozygous coding variants identified in patients

| Case  | Chr       | start (genomic coordinate) | gene                                         | Reference seq. nucleotide change        | Reference seq. protein change                   | variant_type               | dbSNP                                                             | OMIM                                                                     | phypP  | PopMaxFreq | CADD_RAW |
|-------|-----------|----------------------------|----------------------------------------------|-----------------------------------------|-------------------------------------------------|----------------------------|-------------------------------------------------------------------|--------------------------------------------------------------------------|--------|------------|----------|
| P1    | chr1      | 11540258                   | HYPL1                                        | NM_001282541.1.c.1202A>T                | NM_001282541.1.p.Asn470Ile                      | Missense                   |                                                                   | 60205                                                                    | 0.02   | N/A        | 3.021    |
|       | chr3      | 46491431                   | LTF                                          | NM_002343.6.p.G9A>T                     | NM_002343.6.p.Ile324Phe                         | Missense                   | rs138966871                                                       | 150210                                                                   | -3.276 | 0.022      | -1.35074 |
|       | chr3      | 10544856                   | CILB                                         | NM_001317786.1.c.1554A>T                | NM_001317786.1.p.Val62Leu                       | Missense                   |                                                                   | 60481                                                                    | 3.242  | N/A        | 3.8205   |
|       | chr5      | 76171302                   | SILO2                                        | NM_153772.3.c.118C>G                    | NM_153772.3.p.Arg65Gly                          | Missense                   | rs148288662                                                       | 619103                                                                   | 2.296  | 0.001      | 2.50130  |
|       | chr15     | 90784568                   | GDPGP1                                       | NM_001013657.2.c.418C>T                 | NM_001013657.2.p.Arg140Trp                      | Missense                   | rs14721532                                                        |                                                                          | 0.711  | 0.011      | 5.89209  |
|       | chr15     | 9181048                    | BVBL                                         | NM_001020301.1.c.1185G>A                | NM_001020301.1.p.Val395Met                      | Missense                   | rs144134786                                                       | 185861                                                                   | 2.973  | 0.0003     | 4.38217  |
|       | chr18     | 64009303                   | LONRD1                                       | NM_144612.6.c.575G>T                    | NM_144612.6.p.Gly192Val                         | Missense                   |                                                                   | 613072 [Duchenne, autosomal recessive 7]                                 | 5.946  | N/A        | 6.40267  |
|       | chr20     | 47033816                   | ARFGF2                                       | NM_006420.2.c.438A>C                    | NM_006420.2.p.Asn149Thr                         | Missense                   | rs20473805                                                        | 605371 [Periventricular heterotopia with microcephaly]                   | 3.925  | 0.0011     | 5.5007   |
|       | chr20     | 14491155                   | PULF0                                        | NM_078480.2.c.192C>T                    | NM_078480.2.p.Gly74Ser                          | Missense                   | rs170222841                                                       | 604819 [Vohar] syndrome                                                  | 1.819  | 0.0014     | 6.30649  |
|       | chr1      | 18620269                   | TRX1                                         | NM_001049129.2.c.63A>G                  | NM_001049129.2.p.Asn14Asp                       | Missense                   | rs12101907                                                        | 60414 [Adrenocorticotrophic hormone deficiency]                          | 1.961  | 0.0022     | -1.17329 |
|       | chr1      | 19706161                   | ADPR                                         | NM_018138.6.c.830G>A                    | NM_018138.6.p.Arg310Gln                         | Missense                   | rs57735200                                                        | 605481 [Microcephaly 5, primary, autosomal recessive]                    | 1.654  | N/A        | 3.90642  |
|       | chr2      | 2648071                    | GAREM2                                       | NM_001188241.1.c.1354T>A                | NM_001188241.1.p.Ser452Thr                      | Missense                   | rs75878493                                                        | 617900                                                                   | 2.095  | 0.0001     | 1.19151  |
|       | chr2      | 28697010                   | DVCL1                                        | NM_145038.2.c.130C>T                    | NM_145038.2.p.Arg48Gln                          | Missense                   | rs37793949                                                        | 615288 [Clayr dyskinetia, primary, 2]                                    | 0.073  | 0.0003     | 3.54204  |
|       | chr2      | 2955139                    | KCNK3                                        | NM_002346.2.c.653A>T                    | NM_002346.2.p.Ser170Cys                         | Missense                   | rs36524386                                                        | 603200 [Paroxysmal hypertension, primary, 4]                             | 1.609  | 0.0006     | 6.22940  |
|       | chr2      | 17694685                   | EVX2                                         | NM_001084658.1.c.1278_1280delGCG        |                                                 | deletion_inframe_insertion |                                                                   | 142051                                                                   |        |            | N/A      |
| P2    | chr3      | 10543896                   | CILB                                         | NM_001317786.1.c.1480C>T                | NM_001317786.1.p.Arg48*                         | Nonsense                   | rs535219619                                                       | 604491                                                                   | 3.014  | 0.0008     | 11.2208  |
|       | chr3      | 13038488                   | COL4A8                                       | NM_001180808.1.c.5410T>C                | NM_001180808.1.p.Ser184Phe                      | Missense                   | rs77384005                                                        | 616813                                                                   | -0.247 | 0          | 6.96460  |
|       | chr7      | 6014008                    | SDK1                                         | NM_152744.3.c.1945G>A                   | NM_152744.3.p.Arg157Trp                         | Missense                   |                                                                   | 807218                                                                   | 0.002  | N/A        | -0.31616 |
|       | chr11     | 285283                     | NLRP6                                        | NM_138329.2.c.2638G>A                   | NM_138329.2.p.Gly885Arg                         | Missense                   | rs147916708                                                       | 606650                                                                   | -1.885 | 0.0037     | -1.12583 |
|       | chr11     | 1031074                    | MUC6                                         | NM_005961.2.c.295G>A                    | NM_005961.2.p.Val89Met                          | Missense                   | rs19697560                                                        | 158374                                                                   | 1.273  | 0.0013     | 1.14174  |
|       | chr19     | 8321156                    | ZNF414                                       | NM_020540.3.c.141D>T                    | NM_020540.3.p.Gly49Val                          | Missense/stop_gain_variant | rs18601919                                                        |                                                                          | 0.732  | N/A        | 4.69864  |
|       | chr22     | 3243003                    | SLCSA1                                       | NM_000343.3.c.35C>T                     | NM_000343.3.p.Asn12Val                          | Missense                   | rs150288907                                                       | 182300 [Chronic/glaucosic malabsorption]                                 | 1.107  | 0.0023     | 1.62487  |
|       | chr1      | 10046660                   | CDC14A                                       | NM_033112.4.c.1090A>G                   | NM_033112.4.p.Ile364Val                         | Missense                   | rs140849467                                                       | 605004 [Duchenne, autosomal recessive 32, with or without immita spermi] | 4.376  | 0.0034     | 1.29271  |
|       | chr1      | 18020593                   | ZNF448                                       | NM_001009922.1.c.1180C>T                | NM_001009922.1.p.Phe395Ser                      | Missense                   |                                                                   | -0.13                                                                    | N/A    | -0.27462   |          |
|       | chr3      | 60669873                   | CHST1                                        | NM_032099.1.c.151C>G                    | NM_032099.1.p.Phe14Leu                          | Missense                   |                                                                   | 604491                                                                   | -0.178 | N/A        | 6.03048  |
|       | chr3      | 10543896                   | CILB                                         | NM_001317786.1.c.1360C>G                | NM_001317786.1.p.Cys445Trp                      | Missense                   |                                                                   | 604491                                                                   | 0.764  | N/A        | 3.94609  |
|       | chr3      | 108100406                  | MYH5                                         | NM_014681.1.c.5827D>T                   | NM_014681.1.p.Val1943Phe                        | Missense                   | rs201228192                                                       | 609029                                                                   | 0.602  | 0.0081     | 3.18001  |
|       | chr3      | 12080229                   | RDAS                                         | NM_00810.3.c.1460G>A                    | NM_00810.3.p.Arg491Val                          | Missense                   |                                                                   | 610642                                                                   | 5.558  | N/A        | 7.30522  |
|       | chr4      | 1016024                    | FGFR1                                        | NM_00104356.2.c.1193A>A                 | NM_00104356.2.p.Arg33Gln                        | Missense                   | rs57619683                                                        | 605630                                                                   | 0.817  | 0.015      | 2.12777  |
|       | chr4      | 331824                     | RGS12                                        | NM_198229.2.c.327A>C                    | NM_198229.2.p.Gln105Asp                         | Missense                   | rs74855816                                                        | 605512                                                                   | -1.507 | 0.0001     | 0.17139  |
| chr5  | 10040021  | MAN2A1                     | NM_002372.3.c.136G>A                         | NM_002372.3.p.Gly49Ser                  | Missense                                        | rs15675194                 | 154922                                                            | 4.087                                                                    | 0.0045 | 3.7314     |          |
| chr5  | 11946578  | DMXL1                      | NM_001000201.2.c.426C_428delAGTACTCTGAT      | NM_001000201.2.p.Cys143_Ser145delMetLeu | stop_gainedMissense/frameshift_inframe_deletion |                            | 606271                                                            |                                                                          |        | N/A        |          |
| chr5  | 118728798 | ZNF498                     | NM_001288618.1.c.355C>G                      | NM_001288618.1.p.Arg119Asp              | Missense                                        |                            | 612111                                                            | 3.934                                                                    | N/A    | 5.95333    |          |
| chr5  | 14077800  | PCH2A8                     | NM_032088.1.c.1220G>A                        | NM_032088.1.p.Arg407Leu                 | Missense                                        |                            | 606295                                                            | -0.129                                                                   | N/A    | -0.43201   |          |
| chr5  | 14168417  | SPRY4                      | NM_030364.3.c.680G>A                         | NM_030364.3.p.Cys207Trp                 | Missense                                        | rs14683803                 | 607884 [Hypogonadotropic hypogonadism 17 with or without anosmia] | 3.82                                                                     | 0.0082 | 1.52485    |          |
| chr6  | 40153786  | CILS18F                    | NM_016089.3.c.846G>A                         | NM_016089.3.p.Gly284Arg                 | Missense                                        | rs148687309                | 607469                                                            | 0.841                                                                    | 0.0023 | 0.96663    |          |
| chr6  | 16054687  | SCAF8                      | NM_001288188.1.c.34_36delCT                  |                                         | frameshift_variant                              |                            | 616024                                                            |                                                                          |        | N/A        |          |
| chr7  | 6143865   | VWF                        | NM_000562.4.c.3674G>A                        | NM_000562.4.p.Val920Ile                 | Missense                                        | rs201072235                | 613160 [von Willebrand disease]                                   | 2.849                                                                    | 0.001  | 6.41717    |          |
| chr7  | 6346239   | MECP1                      | NM_015593.3.c.1760D>C                        | NM_015593.3.p.Val173Leu                 | Missense                                        | rs152918460                | 611623 [Epileptic encephalopathy, early infantile, 2]             | 2.874                                                                    | 0.0048 | 1.44707    |          |
| chr7  | 11905438  | ETV6                       | NM_001987.4.c.88T>C                          | NM_001987.4.p.Ser30Phe                  | Missense                                        |                            | 600818 [Lukemia, acute myeloid, somatic; Thrombocytopenia 5]      | 4.155                                                                    | N/A    | 2.38149    |          |
| chr7  | 6668889   | HELB                       | NM_033647.4.c.580T>C                         | NM_033647.4.p.Leu189Ser                 | Missense                                        | rs113658249                | 614539                                                            | -0.157                                                                   | 0.0053 | -1.51899   |          |
| chr7  | 6670459   | HELB                       | NM_033647.4.c.191D>A                         | NM_033647.4.p.Trp57P                    | Nonsense                                        | rs140803418                | 614539                                                            | 6.868                                                                    | 0.0002 | 11.3076    |          |
| chr7  | 11380207  | PRCC                       | NM_0025914.1.c.117T>C                        | NM_0025914.1.p.Trp37Arg                 | Missense                                        |                            | 17865 [Protein 2, deficiency]                                     | 1.807                                                                    | N/A    | 2.16364    |          |
| chr7  | 2367936   | DAD1                       | NM_001344.3.c.128G>C                         | NM_001344.3.p.Gly43Asp                  | Missense                                        |                            | 600403                                                            | 4.888                                                                    | N/A    | 3.02155    |          |
| chr7  | 6549287   | CLP                        | NM_003613.3.c.257D>A                         | NM_003613.3.p.Gly88Trp                  | Missense                                        | rs77358848                 | 603489 [Lumbar disc disease, susceptibility to]                   | 7.744                                                                    | 0.0001 | 6.44717    |          |
| chr7  | 20975244  | DNAB3                      | NM_017039.2.c.1992C>T                        | NM_017039.2.p.Phe198Ser                 | Missense                                        | rs15055065                 | 603334                                                            | 0.0003                                                                   | 0      | 4.24607    |          |
| chr7  | 79666910  | APSR2                      | NM_001251888.1.c.951_956delACCTGGACCCGGAGGCC | NM_001251888.1.p.Val118_Phe122del       | deletion_inframe_deletion                       | rs37236666                 | 608238 [Alveolar soft-part sarcoma]                               | 0.0003                                                                   | 0.025  |            |          |
| chr7  | 12766882  | PSMG2                      | NM_002032.4.c.191C>T                         | NM_002032.4.p.Trp46Leu                  | Missense                                        |                            | 609702                                                            | 2.187                                                                    | 0.011  | 0.95926    |          |
| chr20 | 307296    | SOX1                       | NM_000443.3.c.728A>G                         | NM_000443.3.p.Cys43Cys                  | Missense                                        | rs7574674                  | 601947                                                            | 2.367                                                                    | 0.021  | 2.01524    |          |
| chr20 | 2736020   | EPF4                       | NM_00110504.1.c.1702T>A                      | NM_00110504.1.p.Ser58Trp                | Missense                                        | rs146031761                | 600635                                                            | 4.874                                                                    | 0.012  | 0.91863    |          |
| chrX  | 2770818   | OYGD                       | NM_003818.2.c.842A>G                         | NM_003818.2.p.His21Asp                  | Missense                                        |                            | 300198                                                            | 1.727                                                                    | N/A    | -0.755099  |          |
| chrX  | 2205707   | PHX2                       | NM_000444.4.c.610A>T                         | NM_000444.4.p.Ile204Phe                 | Missense                                        |                            | 300550 [Hypophosphemic rickets, X-linked dominant]                | 4.238                                                                    | N/A    | 6.46451    |          |
| chrX  | 4839978   | TRIC105                    | NM_000536.2.c.110D>C                         | NM_000536.2.p.Leu17Phe                  | Missense                                        |                            | 311340                                                            | 3.069                                                                    | N/A    | 1.27555    |          |
| chrX  | 136649132 | ZC3                        | NM_003413.3.c.282T>A                         | NM_003413.3.p.His42Gln                  | Missense                                        |                            | 300265 [Congenital heart defect, non-syndromic, 1, X-linked]      | 0.236                                                                    | N/A    | -0.64645   |          |

PopMaxFreq (Population maximum frequency) indicates the highest frequency of the variant observed in databases. PhyoP scores indicate evolutionary conserved positions (high positive). CADD (Combined Annotation-Dependent Deletion) ranks genetic variants, including single nucleotide variants (SNVs) and short inserts and deletions (indels), throughout the human genome reference assembly. CADD\_RAW score above 4 are considered most as likely pathogenic (33)

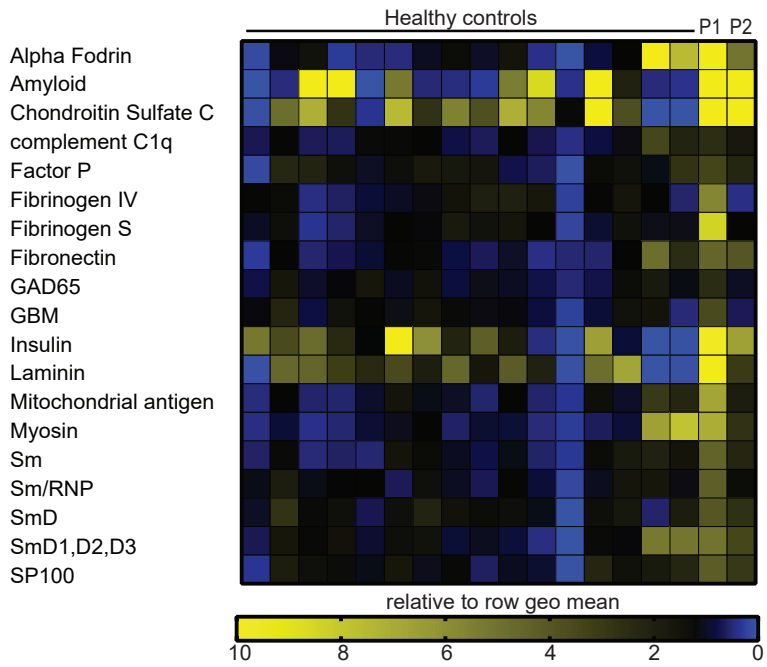

Supplemental Figure 1
